# Supplementary material for: Impact of the Covid-19 Pandemic on Healthcare Utilization and Outcomes Among United States Immigrants
Source: Research Square preprint supplement (doi:10.21203/rs.3.rs-6734643/v1), 2025-07-01

# **Supplementary Materials: Appendices- Sensitivity Analysis**

## A. Zero Inflated Negative Binomial Analysis- Effects of the COVID-19 Pandemic on Emergency Room Visits


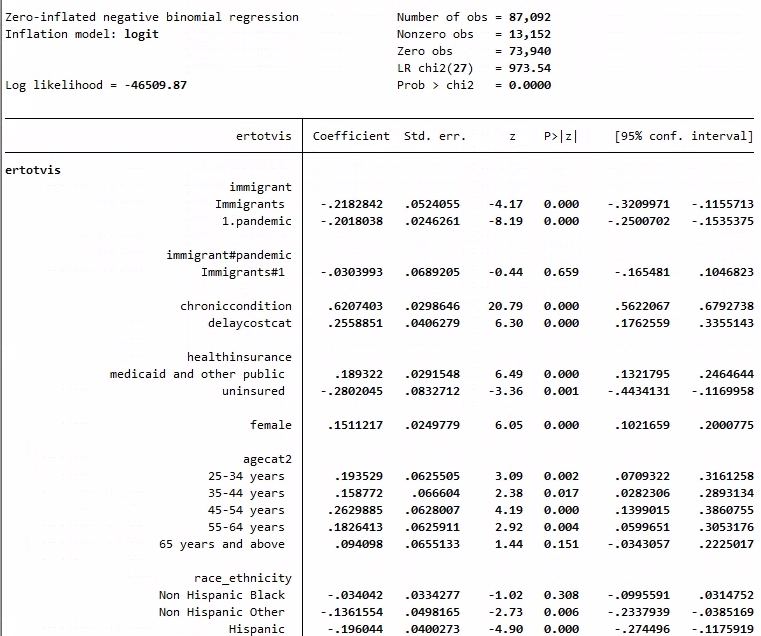


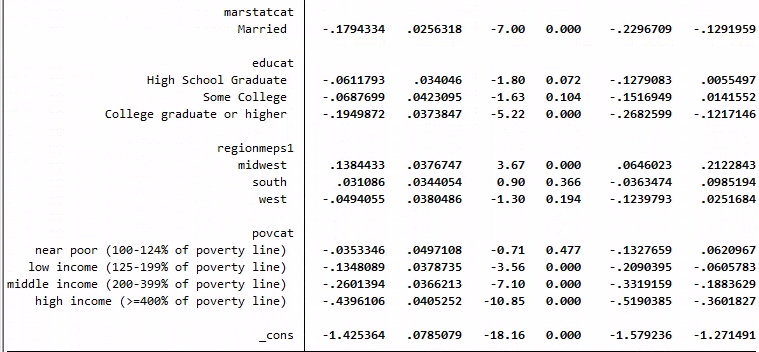


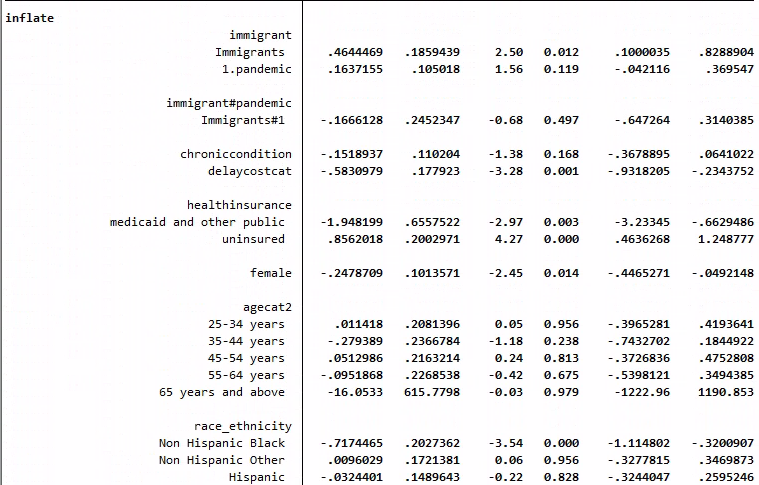


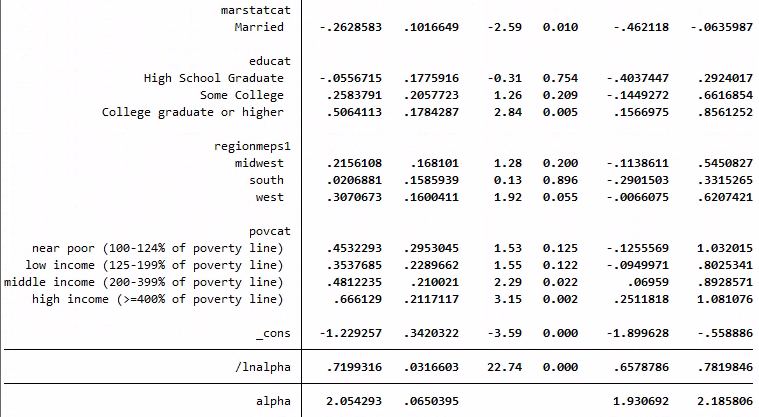


APPENDIX B

## B. Zero Inflated Negative Binomial Analysis- Effects of the COVID-19 pandemic on Hospital Discharges


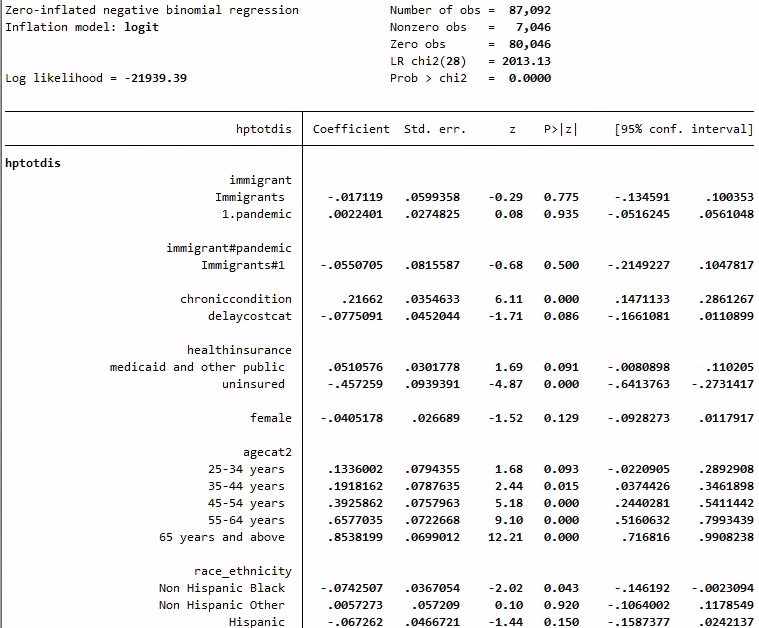


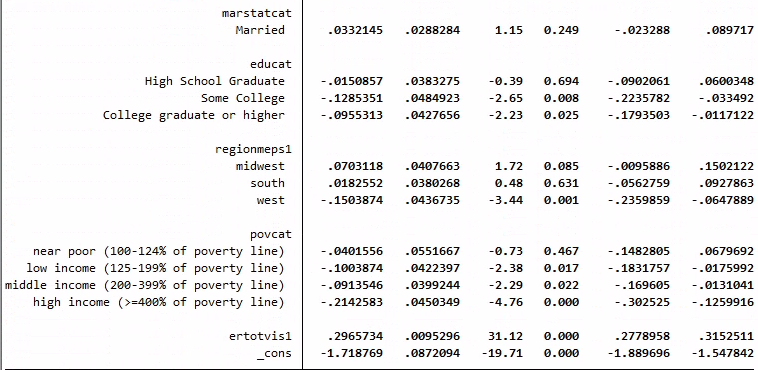


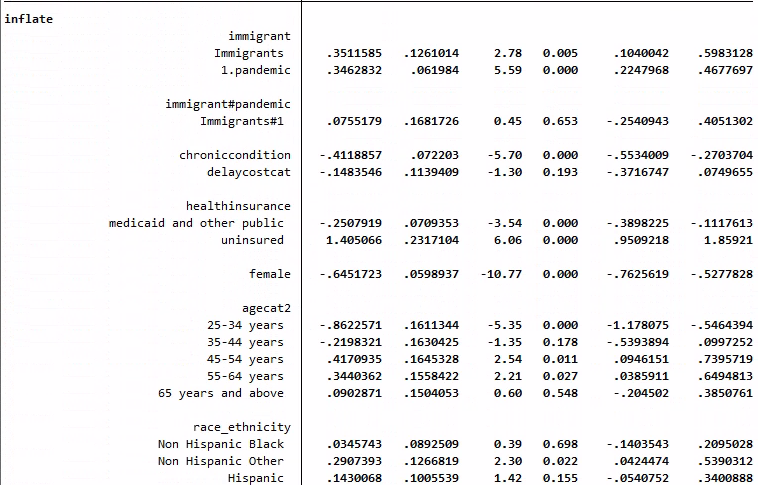


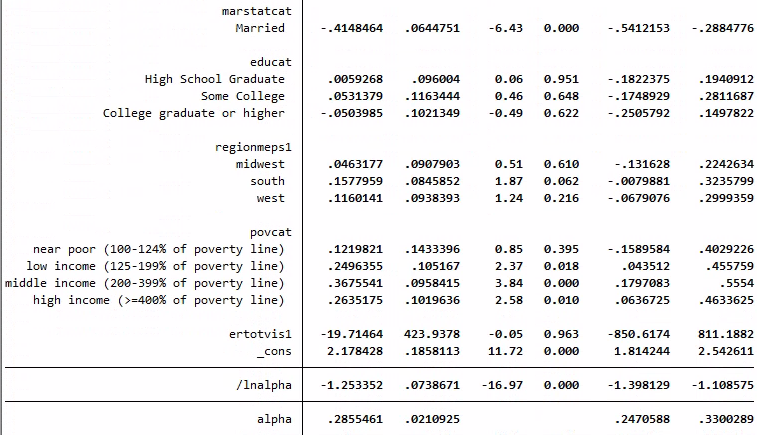


APPENDIX C

## C. Ordinal Logistic Regression Analysis-Effects of the COVID-19 pandemic on Health Outcomes


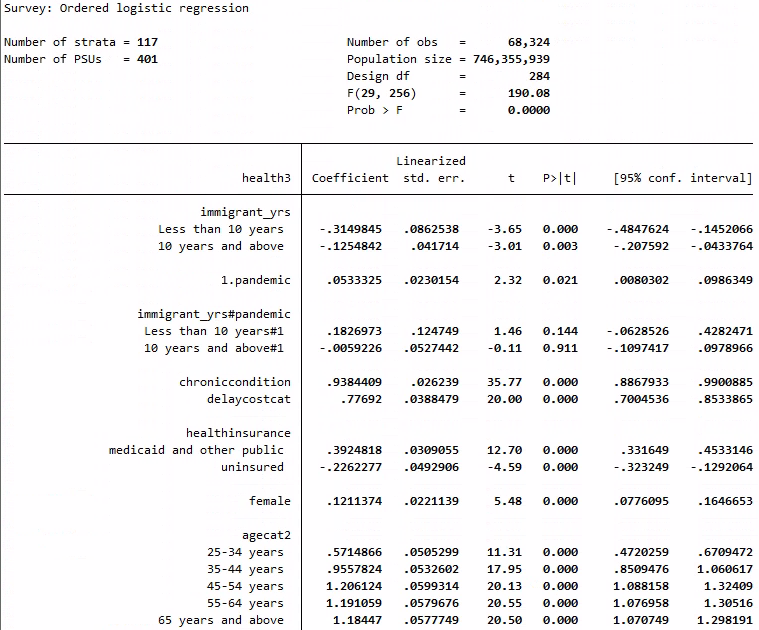


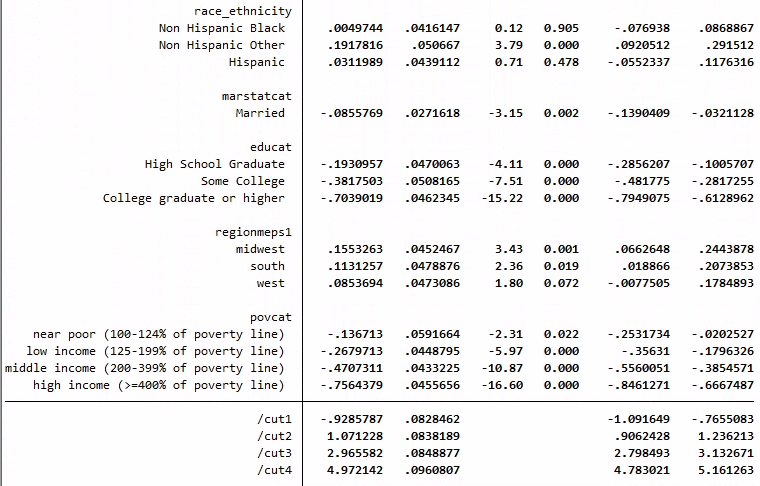


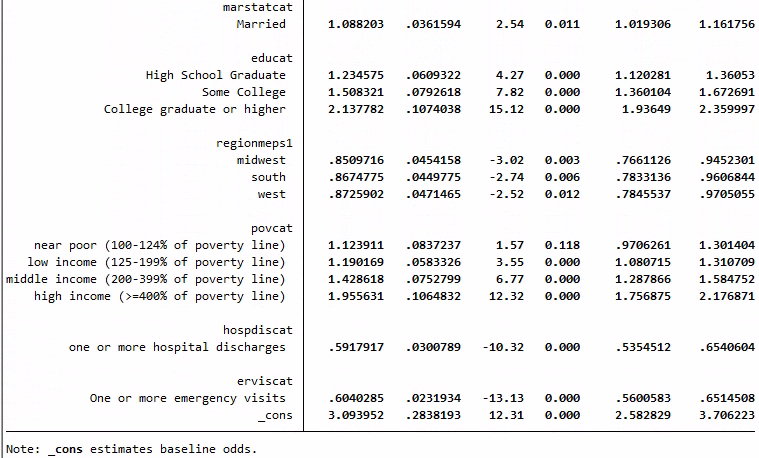


APPENDIX D

## D. Logistic Regression Analysis excluding the year 2020- Effects of the COVID-19 Pandemic on Emergency Room Visits


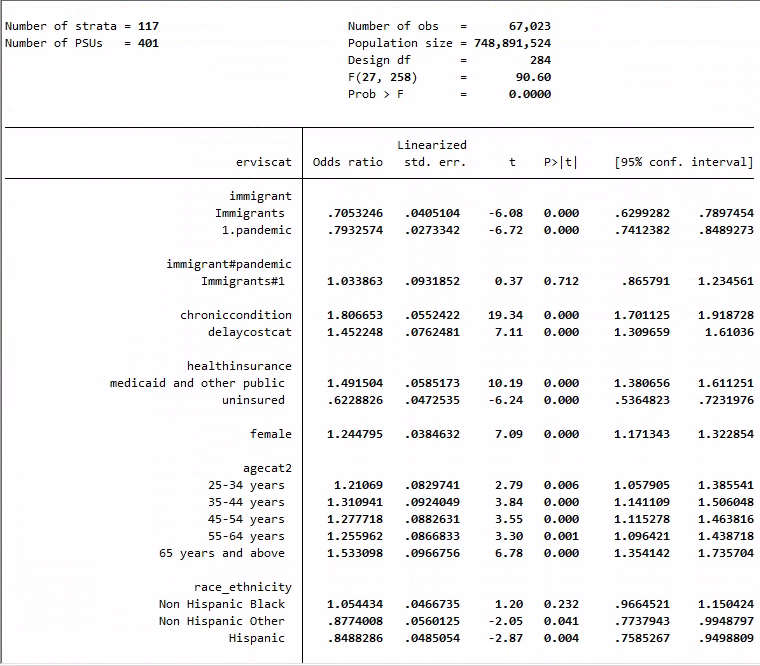


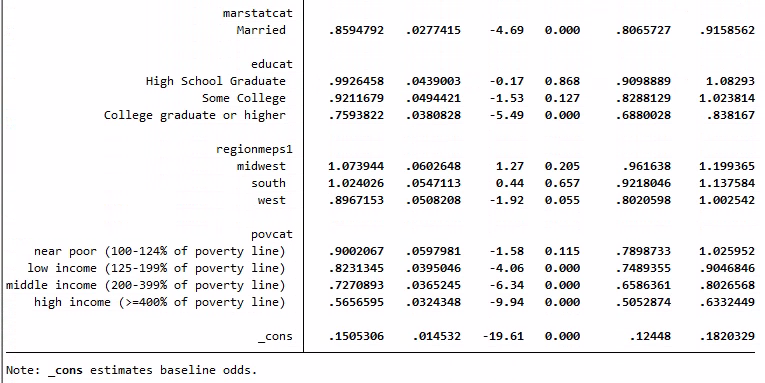


APPENDIX E

## E. Logistic Regression Analysis excluding the year 2020- Effects of the Covid-19 Pandemic on Hospital Discharges


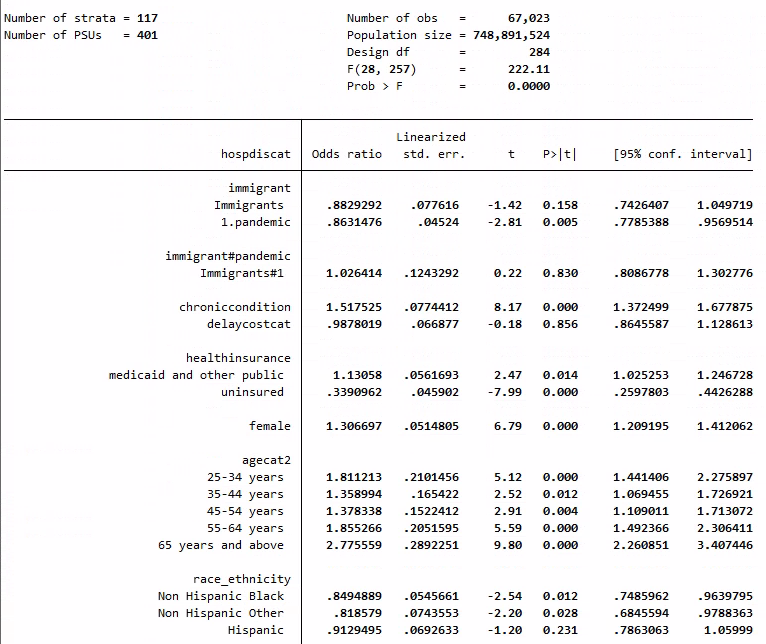


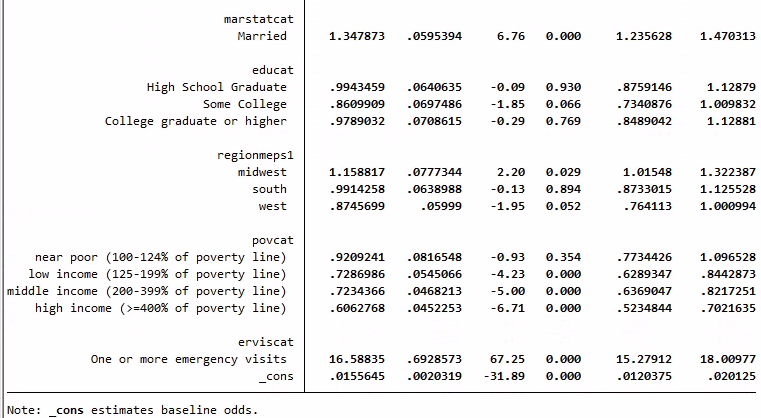


APPENDIX F

## F. Logistic Regression Analysis excluding the year 2020- Effects of the COVID-19 Pandemic on Health Outcomes


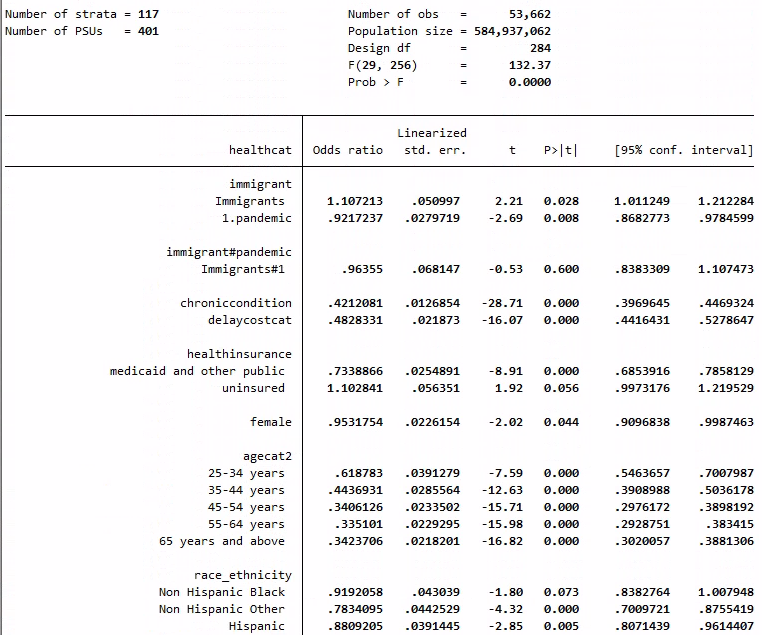


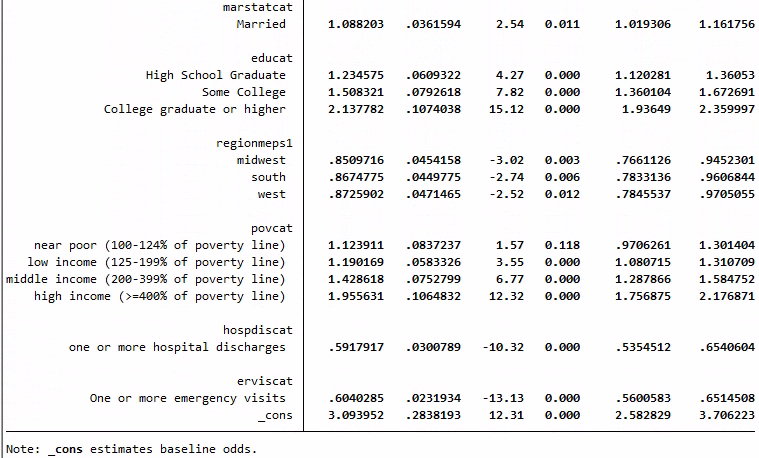


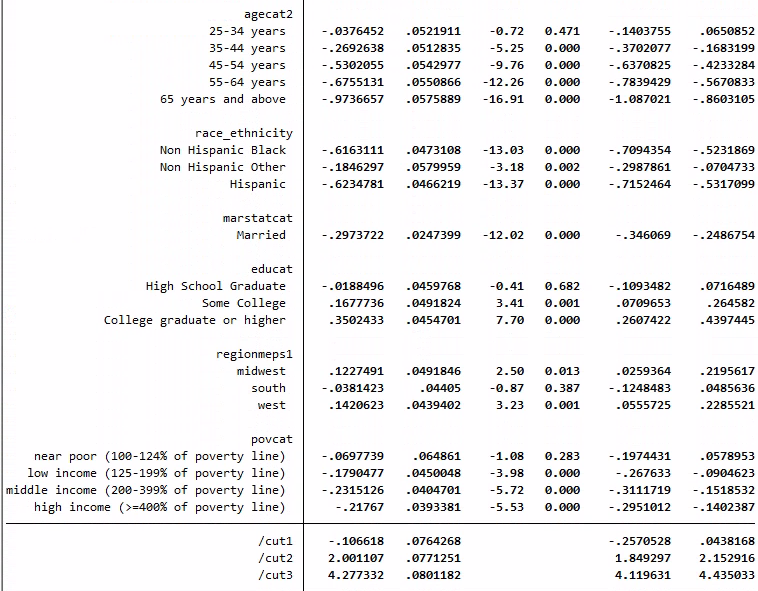

Supplement: Supplementary file 1 [file 18dd7dd13cd55b064f6e8b99.docx]
